# Supplementary material
Source: PubMed Central journal article supplement (PMC2682875)
Supplement: M900759200_1.pdf [file M900759200_1.pdf]

## SUPPLEMENTARY INFORMATIONS

### The block of DNA polymerase $\delta$ strand displacement activity by an abasic site can be rescued by the concerted action of DNA polymerase $\beta$ and flap endonuclease 1.

Giovanni Maga, Barbara van Loon, Emmanuele Crespan, Giuseppe Villani and Ulrich Hübscher

#### Supplementary Experimental Procedures

##### *Chemicals*

Deoxynucleotides were purchased from GeneSpin (Milan, Italy). Labelled  $\gamma(^{32}\text{P})$  ATP was purchased from GE Healthcare. Aphidicolin was purchased from Sigma. All the other reagents were of analytical grade and purchased from Merck or Fluka.

##### *Oligonucleotide DNA substrates sequences*

Template sequence (100mer):

5' TAAGGTAGTAGTATTATAAAATTATGGAGGTTTTXAGTGGGAAATAAAATATAGTAAAGATTATTAGG  
ATTTGAAATTATGTAATTGAAAGTAAATGTAGT-3'

Primers sequences

(29-mer): 5' -ACTACATTTACTTTCAATTACATAATTC-3'

(30-mer): 5' -AATAATCTTTACTATATTTTATTTCCCACT-3'

(31-mer): 5' -AATAATCTTTACTATATTTTATTTCCCACT**A**-3'

Terminators sequences:

(33-mer): 5' -AAAACCTCCATAATTTATAAATACTACTACCTTA-3'

(34-mer): 5' -**CAAA**ACCTCCATAATTTATAAATACTACTACCTTA-3'

(36-mer): 5' -**CTCAAA**ACCTCCATAATTTATAAATACTACTACCTTA-3'

Annealing positions:

36-mer 3' ...TCCAAA**ACTC**

34-mer 3' ...TCCAAA**C**

33-mer 3' ...TCCAAA

30-mer TCACCCTTTATTTTATATCATTTCTAATAA5'

31-mer **ATC**ACCCTTTATTTTATATCATTTCTAATAA5'

29-mer

CTTTAA...5'

100-mer 5' ...AGGTTTT**X**AGTGGGAAATAAAATATAGTAAAGATTATTAGGATTTGAAATT...3'

X = AP site (THF) or G

bold = bases paired to AP site

underlined = template strand

## Supplementary Figure Legends

**Figure S1. PCNA and Fen-1 are required for efficient abasic site bypass by DNA pol  $\beta$  in the presence of salt.** Reactions were performed as described in Materials and Methods. 30 nM human recombinant DNA pol  $\beta$  were tested on the 38 nt Gap AP template in the absence (lanes 1-4) or in the presence (Lanes 5-8) of 100 nM PCNA and 3 nM (Lanes 1, 2, 5, 6) or 1.5 nM (Lanes 3, 4, 7, 8) of human recombinant Fen-1, either in the absence (Lanes 1, 3, 5, 7) or in the presence (Lanes 2, 4, 6, 8) of 75 mM NaCl. Lane 9: mock reaction in the absence of DNA pol  $\beta$ .

**Figure S2. DNA polymerase  $\lambda$  is less efficient in Fen-1 dependent abasic site bypass than DNA polymerase  $\beta$ .** Reactions were performed as described in Materials and Methods. **A.** Human recombinant DNA pol  $\lambda$  was titrated in the presence of linear control (Lanes 1-3), linear AP (Lanes 4-6), 38 nt Gap control (Lanes 7-9) or 30 nt Gap AP (Lanes 10-12) templates. **B.** 100 nM DNA pol  $\lambda$  were tested on 38 nt Gap control (Lanes 1-4; 8-11) or 38 nt Gap AP (Lanes 5-7; 12-15) templates in the presence of RP-A alone (Lanes 1, 5), RP-A and PCNA (lanes 8, 12), RP-A and Fen-1 (Lanes 2-4; 6,7), RP-A, PCNA and Fen-1 (Lanes 9-11; 13-15).

3' 5'  
AP

38 nt Gap AP

+38 —

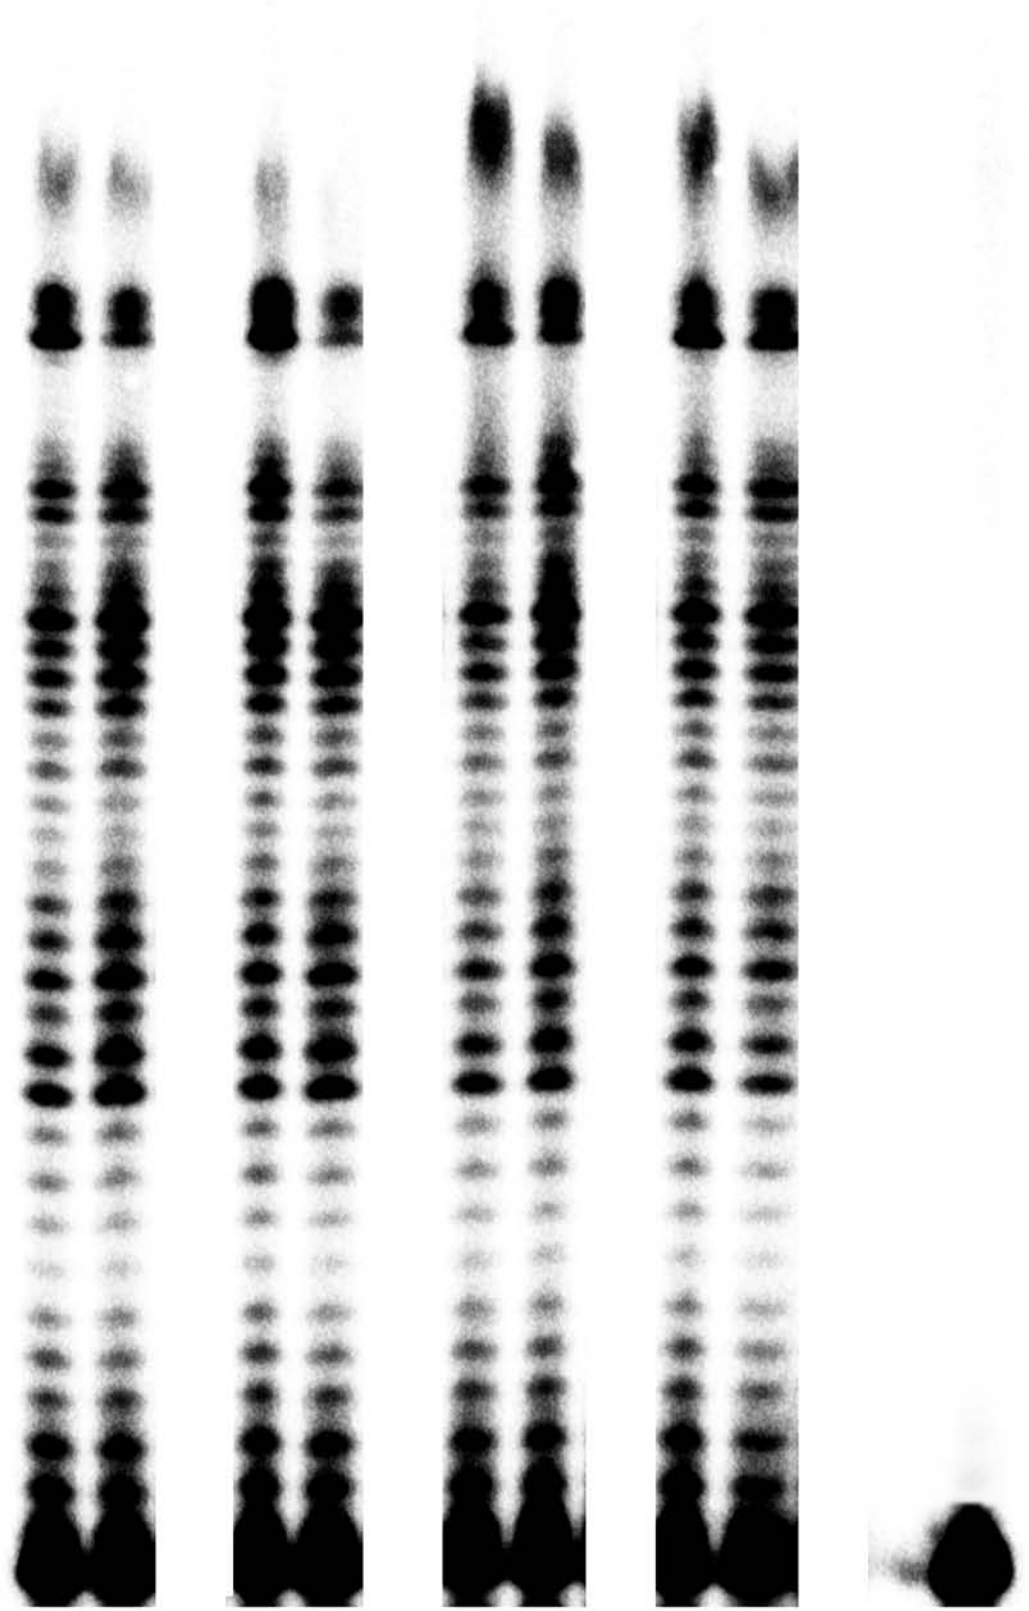

|            |   |    |     |     |     |    |     |     |   |
|------------|---|----|-----|-----|-----|----|-----|-----|---|
| Lanes      | 1 | 2  | 3   | 4   | 5   | 6  | 7   | 8   | 9 |
| Fen-1 (nM) | 3 | 3  | 1.5 | 1.5 | 3   | 3  | 1.5 | 1.5 |   |
| NaCl (mM)  | - | 75 | -   | 75  | -   | 75 | -   | 75  |   |
| PCNA (nM)  | - |    |     |     | 100 |    |     |     |   |

30 nM DNA pol β

Figure S1

**A**

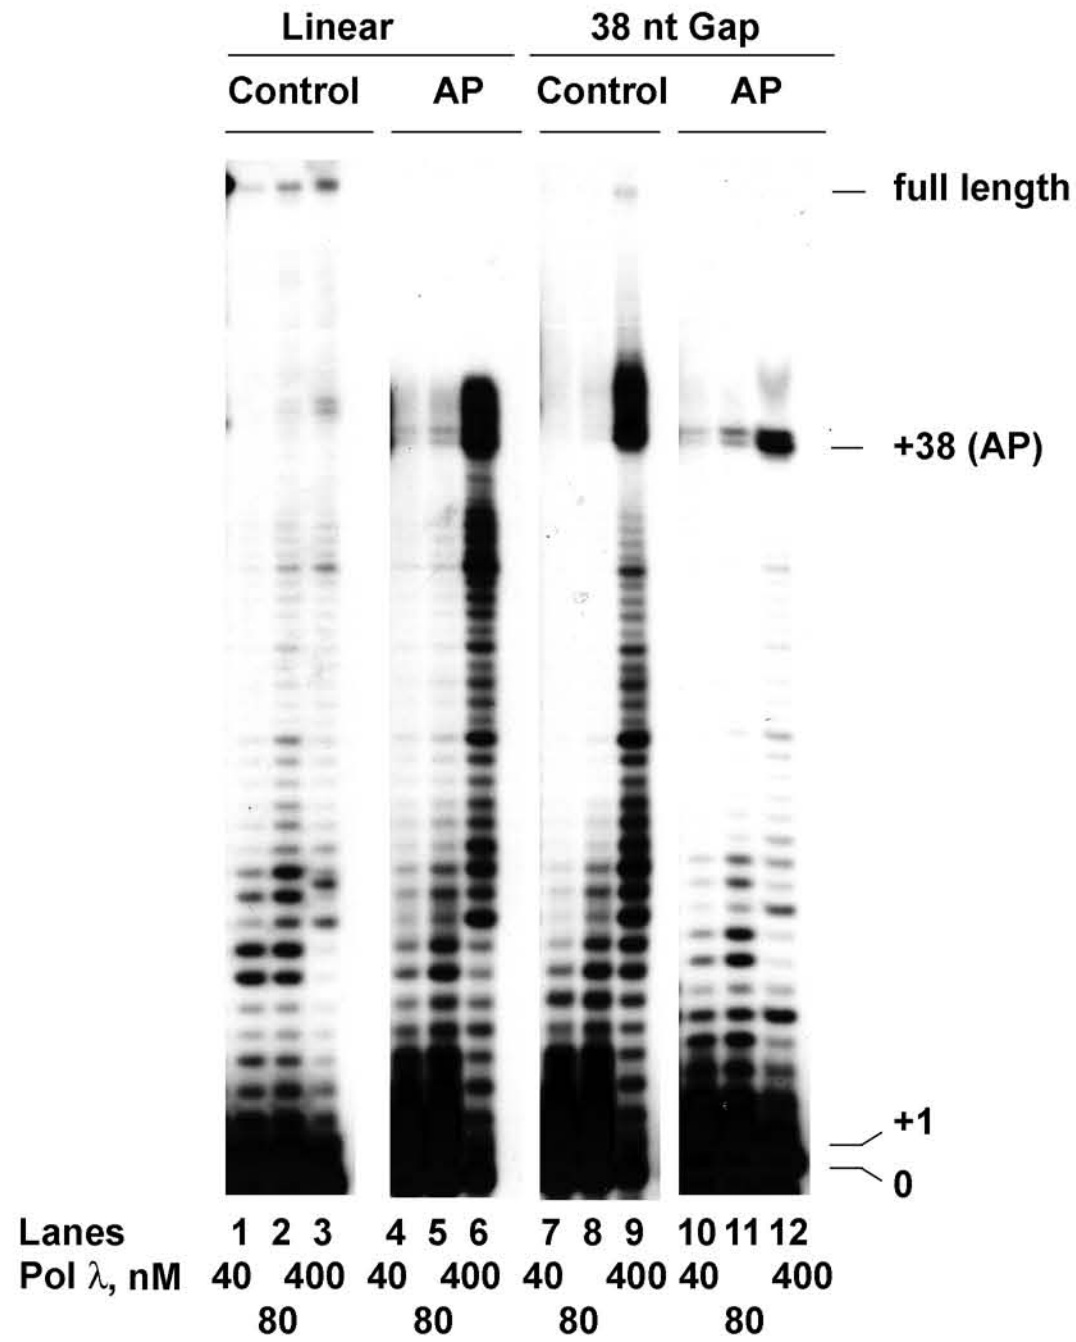

**B**

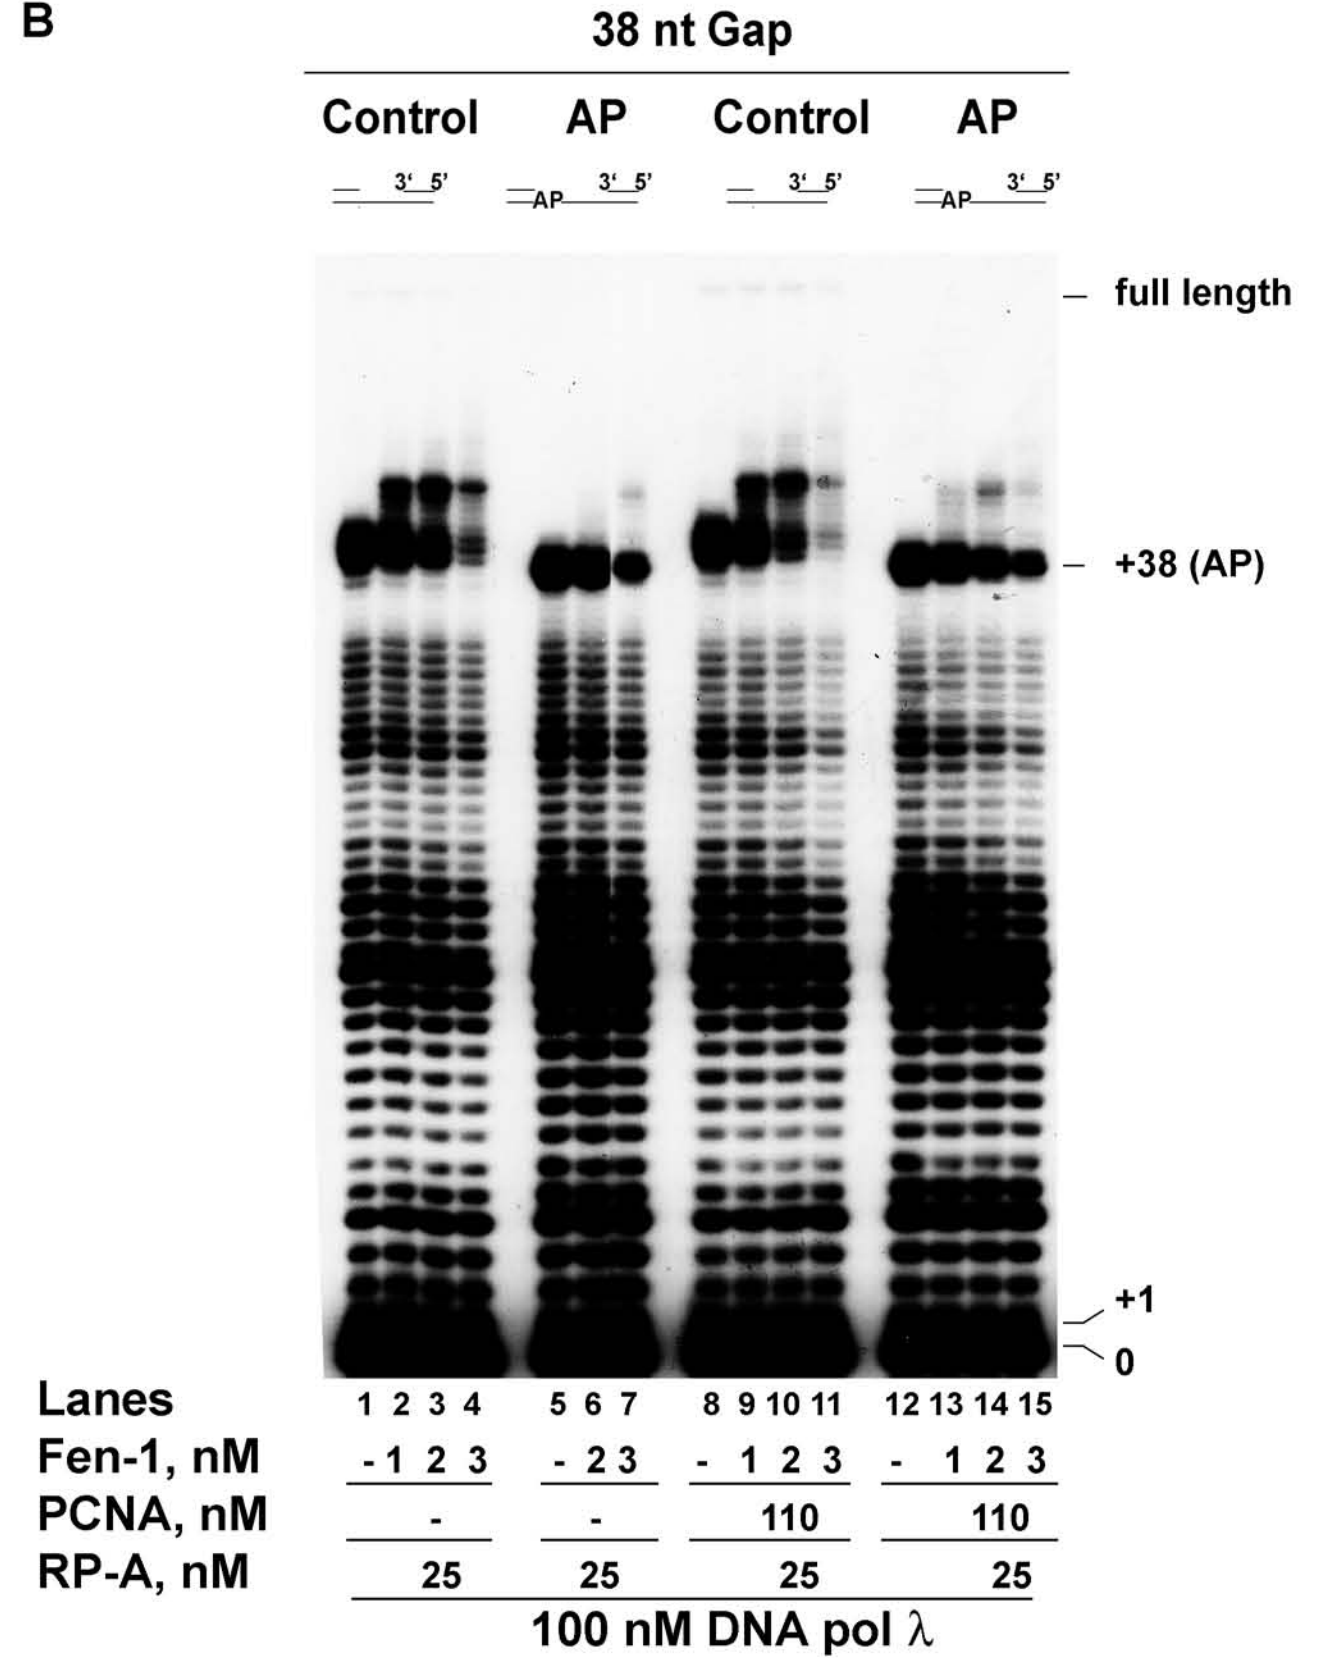

Figure S2
